# Supplementary material for: An integrated approach to correction for off-resonance effects and subject movement in diffusion MR imaging
Source: PubMed Central journal article supplement (PMC4692656; doi:10.1016/j.neuroimage.2015.10.019), 2016-01-15
Supplement: mmc5.pdf [file mmc5.pdf]

## C Supplementary material

Here we have put results that we have either deemed superfluous to the main article or which cannot be displayed in print (*i.e.* movies).

### C.1 Tables

For all these tables the presented metric is the sum-of-squared pairwise (for pairs with the same diffusion weighting by different PE-direction) differences averaged across all intracerebral voxels (as assessed by mask passed to eddy) and across all pairs.

For all tables we have attempted to help the reader by highlighting the entry with the lowest sum-of-squared difference in the relevant row (or column, depending on the organization of the table).

#### C.1.1 Dependence on the method for estimating GP hyperparameters

There is no clear preference for either method based on the data in table C1. As we outline in the main text our final preference EC and 2nd level model is to use a quadratic EC model and to not use a 2nd level model. When looking at the results in table C1 for that case (the first three columns) one sees that Cross validation performs best for two of the  $b$ -values (5000 and 7000) and second best for  $b=1500$ . Based on that and on the appealing conceptual simplicity of leave-one-out cross validation we decided to use that as default and for the remainder of the paper.

#### C.1.2 Assessing the effect of spatial smoothing

From tables C2, C3 and C4 we conclude that the dependence of the pre-smoothing FWHM is quite weak. For one set of data (the HCP  $b=1500$ , table C4) there seems to be a stronger

| EC-model:        |             | Quadratic   |             |      |           |      |  |
|------------------|-------------|-------------|-------------|------|-----------|------|--|
| 2nd level model: |             | None        |             |      | Quadratic |      |  |
| <i>b</i> -value  | MML         | CV          | GPP         | MML  | CV        | GPP  |  |
| 1500             | 4936        | 4875        | <b>4873</b> | 5180 | 5203      | 5220 |  |
| 3000             | <b>2729</b> | 2752        | 2742        | 2829 | 2824      | 2864 |  |
| 5000             | 1850        | <b>1826</b> | 1829        | 1852 | 1837      | 1838 |  |
| 7000             | 1589        | <b>1588</b> | 1589        | 1594 | 1590      | 1593 |  |

  

| EC-model:        |             | Cubic       |             |      |           |      |  |
|------------------|-------------|-------------|-------------|------|-----------|------|--|
| 2nd level model: |             | None        |             |      | Quadratic |      |  |
| <i>b</i> -value  | MML         | CV          | GPP         | MML  | CV        | GPP  |  |
| 1500             | <b>4926</b> | 5064        | 4946        | 5075 | 5220      | 5252 |  |
| 3000             | <b>2690</b> | 2720        | 2708        | 2745 | 2826      | 2827 |  |
| 5000             | 1824        | 1817        | <b>1816</b> | 1844 | 1832      | 1836 |  |
| 7000             | 1554        | <b>1553</b> | 1569        | 1565 | 1570      | 1572 |  |

Table C1: This table shows the average squared-difference for the HCP 3T data ( $\mathcal{C}$ ) between images obtained with the same diffusion gradient, but different PE-directions. `eddy` has been run with either a second or third order model for the EC fields, with estimated parameters either not regularised at all or regularised using a second order polynomial. These cases were chosen from the greater set of EC models and regularisations as these cases were shown in table C6 to give the best results. For these cases the method for estimating the hyperparameters was varied between Marginal Maximum Likelihood (MML), Cross Validation (CV) and Geisser’s Surrogate Predictive Probability (GPP).

| EC-model:        | linear     |            |            | quadratic  |            |            | cubic      |            |            |
|------------------|------------|------------|------------|------------|------------|------------|------------|------------|------------|
| 2nd-level model: | none       | lin        | quad       | none       | lin        | quad       | none       | lin        | quad       |
| FWHM (mm)        |            |            |            |            |            |            |            |            |            |
| 0                | 511        | <b>513</b> | <b>511</b> | 417        | <b>421</b> | <b>418</b> | <b>411</b> | <b>417</b> | 415        |
| 1                | 511        | <b>513</b> | <b>511</b> | 417        | <b>421</b> | <b>418</b> | 412        | <b>417</b> | <b>414</b> |
| 2                | <b>510</b> | <b>513</b> | <b>511</b> | <b>415</b> | <b>421</b> | <b>418</b> | <b>411</b> | <b>417</b> | <b>414</b> |
| 3                | <b>510</b> | 514        | 512        | <b>415</b> | 422        | 419        | 412        | 418        | 415        |
| 5                | 515        | 517        | 516        | 418        | 427        | 424        | 415        | 421        | 419        |

Table C2: This table shows the sum-of-squared pairwise differences for the FMRIB 2mm data ( $\mathcal{A}$ ) as a function of the FWHM of a pre-conditioning smoothing applied to the data. It can be seen that for all EC and 2nd level models the dependence on FWHM is very weak and that an “optimum” FWHM is at 2mm.

| EC-model:        | linear     |            |            | quadratic  |            |            | cubic      |            |            |
|------------------|------------|------------|------------|------------|------------|------------|------------|------------|------------|
| 2nd-level model: | none       | lin        | quad       | none       | lin        | quad       | none       | lin        | quad       |
| FWHM (mm)        |            |            |            |            |            |            |            |            |            |
| 0                | 780        | 780        | 780        | 727        | 727        | 725        | 724        | 721        | 720        |
| 1                | 780        | 780        | 779        | 726        | 726        | 725        | 724        | 721        | 721        |
| 2                | 770        | 769        | 768        | 716        | <b>716</b> | <b>715</b> | 714        | <b>714</b> | <b>713</b> |
| 3                | <b>768</b> | <b>767</b> | <b>767</b> | <b>713</b> | 718        | 716        | <b>712</b> | 715        | <b>713</b> |
| 5                | 770        | 770        | 771        | 720        | 735        | 728        | 721        | 729        | 723        |

Table C3: This table shows the sum-of-squared pairwise differences for the FMRIB 1.5mm data ( $\mathcal{B}$ ) as a function of the FWHM of a pre-conditioning smoothing applied to the data. It can be seen that for all EC and 2nd level models the dependence on FWHM is very weak and that an “optimum” FWHM is at 3mm.

|                  |             |             |             |             |             |             |             |             |
|------------------|-------------|-------------|-------------|-------------|-------------|-------------|-------------|-------------|
| EC-model:        | quadratic   |             |             |             |             |             |             |             |
| 2nd level model: | none        |             |             |             | quadratic   |             |             |             |
| $b$ -value:      | 1500        | 3000        | 5000        | 7000        | 1500        | 3000        | 5000        | 7000        |
| FWHM (mm)        |             |             |             |             |             |             |             |             |
| 0                | 5062        | 2733        | 1846        | 1592        | <b>5040</b> | 2820        | 1851        | 1593        |
| 1                | <b>4921</b> | 2746        | 1846        | 1590        | <b>5040</b> | <b>2794</b> | 1851        | 1592        |
| 2                | 5028        | <b>2722</b> | 1825        | 1576        | 5212        | 2853        | 1828        | 1576        |
| 3                | 5232        | 2744        | <b>1806</b> | <b>1559</b> | 5596        | 2866        | 1819        | 1556        |
| 5                | 6930        | 2767        | 1829        | <b>1559</b> | 5362        | 2946        | <b>1811</b> | <b>1552</b> |

---

|                  |             |             |             |             |             |             |             |             |
|------------------|-------------|-------------|-------------|-------------|-------------|-------------|-------------|-------------|
| EC-model:        | cubic       |             |             |             |             |             |             |             |
| 2nd level model: | none        |             |             |             | quadratic   |             |             |             |
| $b$ -value:      | 1500        | 3000        | 5000        | 7000        | 1500        | 3000        | 5000        | 7000        |
| FWHM (mm)        |             |             |             |             |             |             |             |             |
| 0                | <b>4995</b> | <b>2702</b> | 1826        | <b>1553</b> | 5239        | 2774        | 1840        | 1568        |
| 1                | 5000        | 2703        | 1818        | 1554        | <b>5128</b> | 2790        | 1836        | 1564        |
| 2                | 5145        | 2710        | <b>1812</b> | 1559        | 5389        | 2771        | 1829        | 1562        |
| 3                | 5166        | 2807        | 1828        | 1559        | 5160        | 2819        | <b>1814</b> | 1552        |
| 5                | 5700        | 2850        | 1849        | 1565        | 5328        | <b>2770</b> | 1934        | <b>1542</b> |

Table C4: This table shows the sum-of-squared pairwise differences for the HCP 3T data ( $\mathcal{C}$ ) as a function of the FWHM of a pre-conditioning smoothing applied to the data. It can be seen that for the  $b=1500$  data there is some appreciable dependence on FWHM and that the optimum is 0-2mm. It can further be seen that as one goes to higher  $b$ -values the optimum FWHM increases with optimums of 1-2mm for 3000, 2-5mm for 5000 and 3-5mm for 7000. However, it can also be seen that the dependence is quite weak for these  $b$ -values.

| Voxel<br>size<br>(mm) | susc<br>only | eddy_<br>_correct | eddy   |     |      |           |     |      |            |     |            |
|-----------------------|--------------|-------------------|--------|-----|------|-----------|-----|------|------------|-----|------------|
|                       |              |                   | linear |     |      | quadratic |     |      | cubic      |     |            |
|                       |              |                   | none   | lin | quad | none      | lin | quad | none       | lin | quad       |
| 1.5                   | 1031         | 995               | 780    | 780 | 780  | 727       | 727 | 725  | 724        | 721 | <b>720</b> |
| 2                     | 845          | 881               | 511    | 513 | 511  | 417       | 421 | 418  | <b>411</b> | 417 | 415        |

Table C5: This table shows the sum-of-squared pairwise differences for the FMRI data after correction for susceptibility only, using `eddy_correct` and `eddy`. The `eddy` results are tabulated for linear, quadratic and cubic models for the EC-induced fields. For each of those fields the parameters are modeled using different assumptions for how diffusion gradients translate into EC (none, linear or quadratic). We can see `eddy` performs substantially better than `eddy_correct` even when using a linear model (*i.e.* a subset of the model used by `eddy_correct`). It is also clear that the quadratic model for the EC fields perform better than the linear, whereas it is less clear that a cubic model offers any additional advantage. Finally it is not clear that the 2nd level model improves anything. Data sets **A** and **B** were used for this table.

dependence, and for that there was a preference towards smaller FWHM. Based on this, and for simplicity, we suggest using an FWHM of 0 as default, and that is what has been used for the remainder of the paper.

### C.1.3 Assessing the impact of EC-model and 2nd level model

Our conclusion from tables C5 and C6 is that allowing for quadratic EC-fields results in considerably better results. It is not clear that going to cubic EC-fields improve things much further, nor is it clear that employing a 2nd level model helps, and in particular a linear 2nd level model appears to give worse results than when not using a model or when using a quadratic 2nd level model.

| <i>b</i> -value | susc  | eddy_    | eddy   |      |      |           |      |      |             |             |      |
|-----------------|-------|----------|--------|------|------|-----------|------|------|-------------|-------------|------|
|                 | only  | _correct | linear |      |      | quadratic |      |      | cubic       |             |      |
|                 |       |          | none   | lin  | quad | none      | lin  | quad | none        | lin         | quad |
| 1500            | 12970 | 6969     | 6188   | 6248 | 6218 | 4630      | 4481 | 4501 | <b>4449</b> | <b>4449</b> | 4497 |
| 3000            | 5900  | 4351     | 3338   | 3356 | 3346 | 2716      | 2642 | 2648 | 2632        | <b>2630</b> | 2641 |
| 5000            | 3436  | 2802     | 2078   | 2095 | 2086 | 1827      | 1842 | 1838 | <b>1826</b> | 1838        | 1837 |
| 7000            | 2462  | 2040     | 1710   | 1720 | 1694 | 1579      | 1625 | 1603 | <b>1575</b> | 1600        | 1584 |

Table C6: This table shows the sum-of-squared pairwise differences for the HCP 3T data (**C**). The second and third columns correspond to susceptibility correction only and correction with `eddy_correct` respectively. The remaining columns correspond to correction with `eddy` using different EC models (first, second or third order polynomials) and models for how diffusion gradients translate into EC (none, linear or quadratic). We can see `eddy` performs substantially better than `eddy_correct` even when using a linear model (*i.e.* a subset of the model used by `eddy_correct`). It is also clear that the quadratic model for the EC fields perform better than the linear, whereas it is less clear that a cubic model offers any additional advantage. Finally it is not clear that the 2nd level model improves anything. The data in the table is also summarized in figure 6.

| EC-model:       | quadratic   |             |             |             | cubic       |             |             |             |
|-----------------|-------------|-------------|-------------|-------------|-------------|-------------|-------------|-------------|
| $b$ -value:     | 1500        | 3000        | 5000        | 7000        | 1500        | 3000        | 5000        | 7000        |
| Modeling option | <hr/>       |             |             |             |             |             |             |             |
| Separate        | 5062        | 2733        | <b>1846</b> | 1592        | 4995        | 2702        | <b>1826</b> | 1553        |
| Joint           | <b>4473</b> | <b>2400</b> | 1855        | <b>1438</b> | <b>4495</b> | <b>2393</b> | 1854        | <b>1433</b> |

Table C7: This table shows the sum-of-squared pairwise differences for the HCP 3T data (**C**). The first row shows the results when registering each shell separately, and the second row when modeling and registering all four shells simultaneously.

#### C.1.4 Joint modeling of multi-shell data

The results in table C7 indicate that there is indeed an advantage to modeling the shells together when correcting multi-shell data. Interestingly there seem to be a clear advantage for all shell except for the  $b=5000$  shell for which the correction seems to be similar/slightly worse when modeled in conjunction with the other shells.

Base on these results we recommend modeling all shells together when working with multi-shell data.

## C.2 Movies

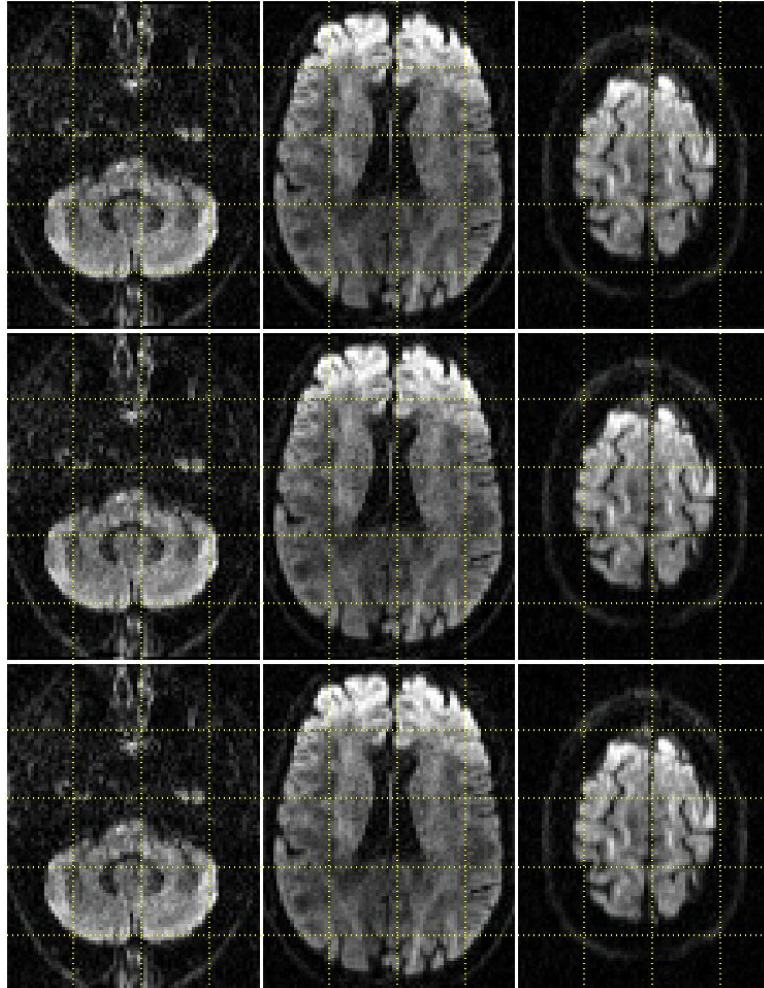

Figure C1: N.B. This is a still from the attached movie `movie_2mm_FMRIB.gif`. The movie shows three slices through the 2mm FMRIB data. The bottom row shows data corrected only for susceptibility, the middle row after correction with `eddy` assuming a linear EC model and the top row assuming a quadratic model. Data set  $\mathcal{A}$  was used for this movie.



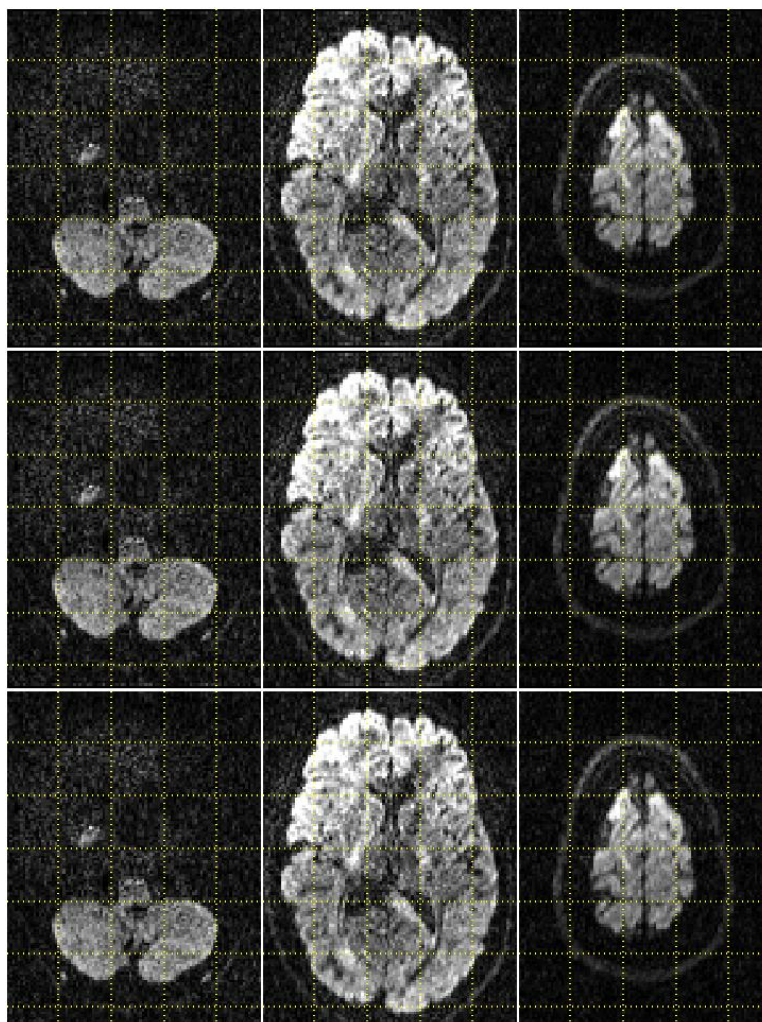

Figure C2: N.B. This is a still from the attached movie `movie_15mm_FMRIB.gif`. The movie shows three slices through the 1.5mm FMRIB data. The bottom row shows data corrected only for susceptibility, the middle row after correction with `eddy` assuming a linear EC model and the top row assuming a quadratic model. Data set  $\mathcal{B}$  was used for this movie.

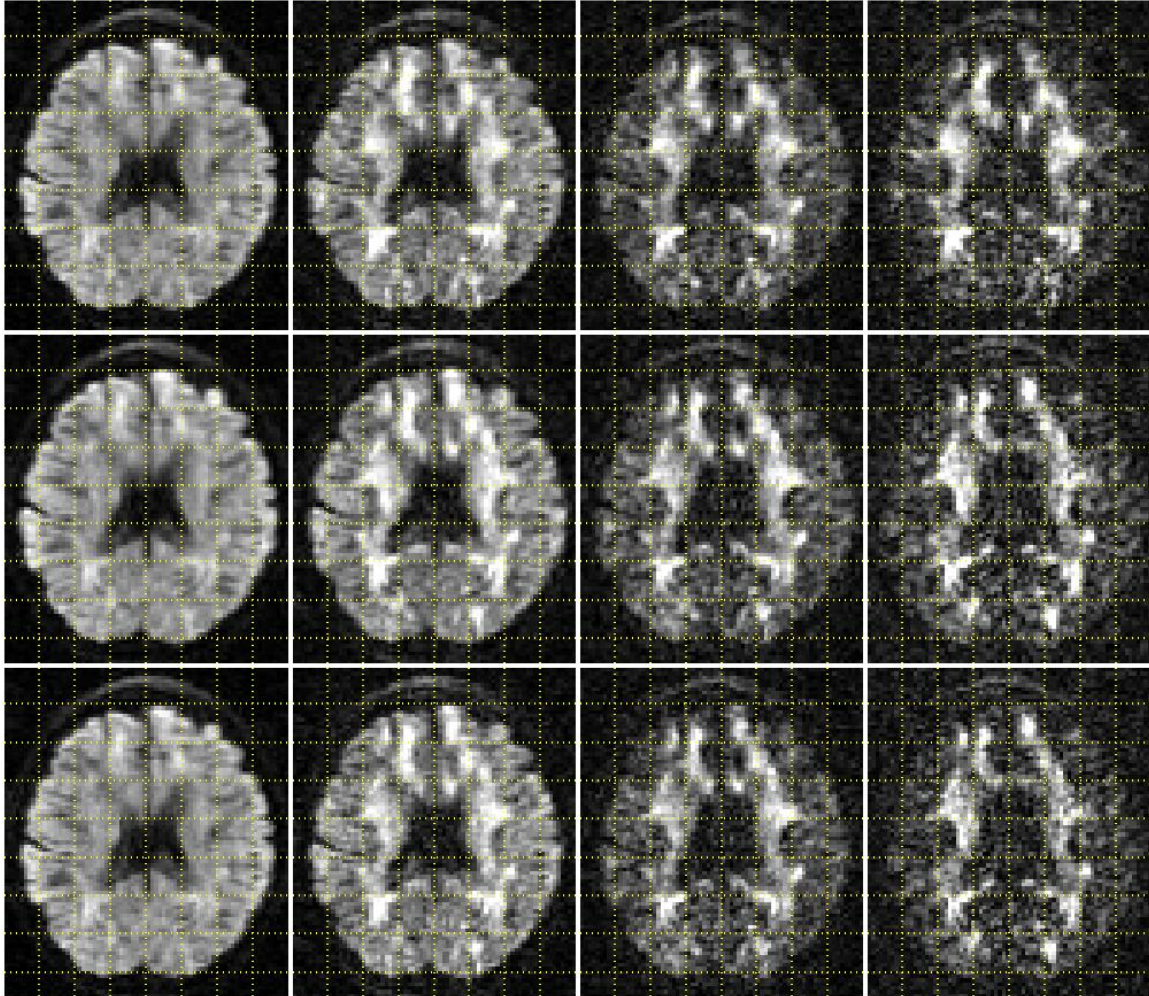

Figure C3: N.B. This is a still from the attached movie `movie_old_HCP.gif`. The columns show data acquired with, from left to right,  $b$ -values of 1500, 3000, 5000 and 7000. The bottom row shows data corrected only for susceptibility, the middle row shows data additionally corrected using `eddy_correct` and the top row after correction with `eddy`. Data set  $\mathcal{C}$  was used for this movie.



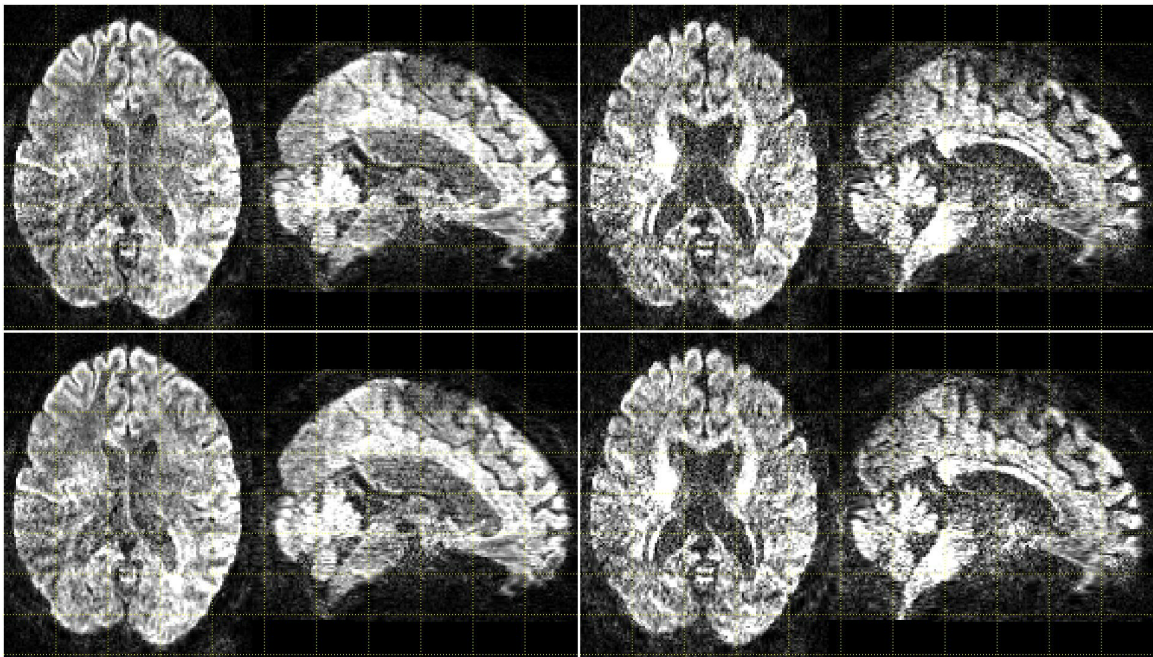

Figure C4: N.B. This is a still from the attached movie `movie_7T.gif`. The left hand side of the movie shows the HCP 7T data acquired with a  $b$ -value of 1000 and the right hand side with a  $b$ -value of 2000. The bottom row shows data corrected only for susceptibility and the top row after correction with `eddy`. Data set  $\mathcal{E}$  was used for this movie.
